# Supplementary material for: Activity-dependent conformational transitions of the insulin receptor–related receptor
Source: PubMed Central journal article supplement (PMC8058561; doi:10.1016/j.jbc.2021.100534), 2021-03-11
Supplement: mmc1.pdf [file mmc1.pdf]

## Supporting Material

### Activity-dependent conformational transitions of the insulin receptor-related receptor

Oleg V. Batishchev<sup>1\*#</sup>, Natalia V. Kuzmina<sup>1#</sup>, Andrey A. Mozhaev<sup>2,3</sup>, Alexander S. Goryashchenko<sup>2</sup>, Ekaterina D. Mileshina<sup>2</sup>, Alexander N. Orsa<sup>2</sup>, Eduard V. Bocharov<sup>2,4</sup>, Igor E. Deyev<sup>2</sup>, Alexander G. Petrenko<sup>2</sup>

<sup>1</sup> A.N. Frumkin Institute of Physical Chemistry and Electrochemistry, Russian Academy of Sciences, Moscow, Russia;

<sup>2</sup> Shemyakin–Ovchinnikov Institute of Bioorganic Chemistry, Russian Academy of Sciences, Moscow, Russia

<sup>3</sup> Shubnikov Institute of Crystallography of Federal Scientific Research Centre “Crystallography and Photonics”, Russian Academy of Sciences, Moscow, Russia

<sup>4</sup> Moscow Institute of Physics and Technology, Dolgoprudniy, Moscow Region, Russia

\* Correspondence: olegbati@gmail.com; Tel.: +7-495-955-4585

# These authors contributed equally to the work

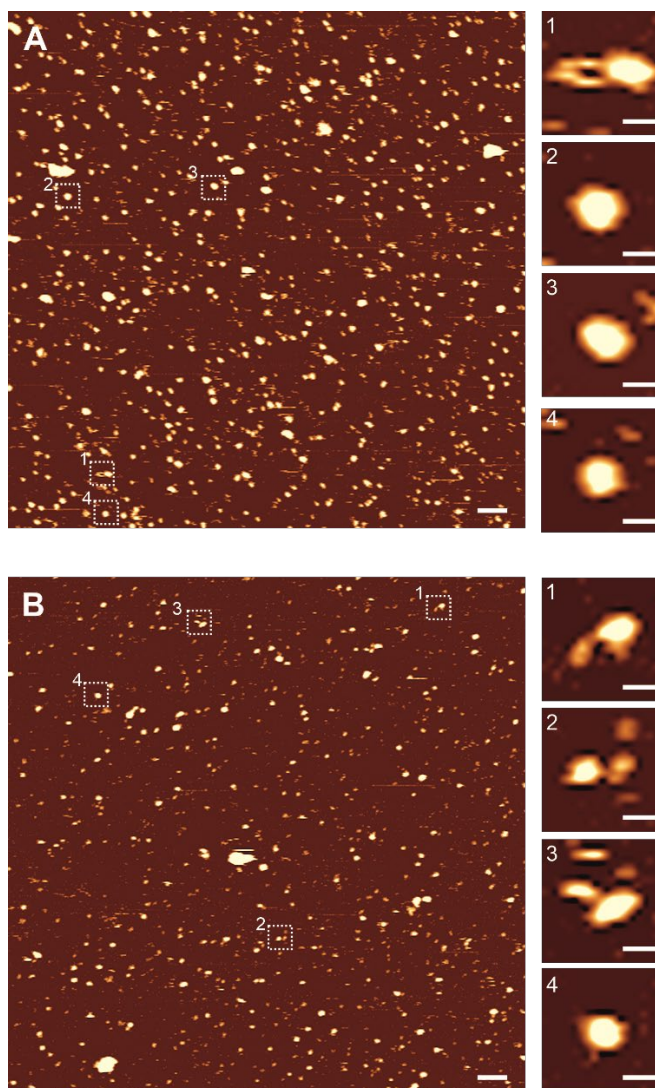

**Figure S1.** Examples of large-scale AFM images of the full-length IRR in micelles used for selection of typical conformations. **A** – pH 7.0, **B** – pH 9.0. A 2-4 and B 4 represent empty micelles. Scale bars are 100 nm for the main images and 20 nm for zoom-ins. Z-scale is 4 nm.
